# Supplementary material
Source: publisher site journal article supplement (https://www.dovepress.com/article/352049)

## Appendices

### Appendix 1: IR spectrum of compound TA

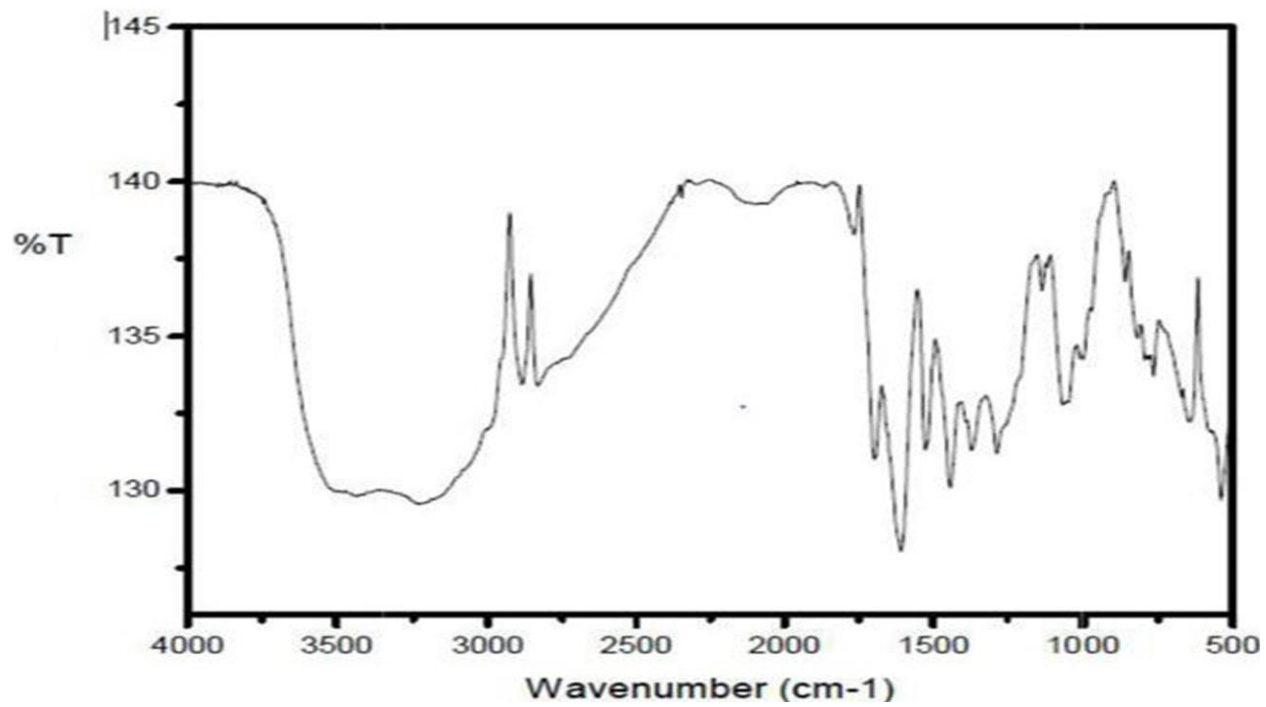

Appendix 2:  $^1\text{H-NMR}$  spectrum of compound TA

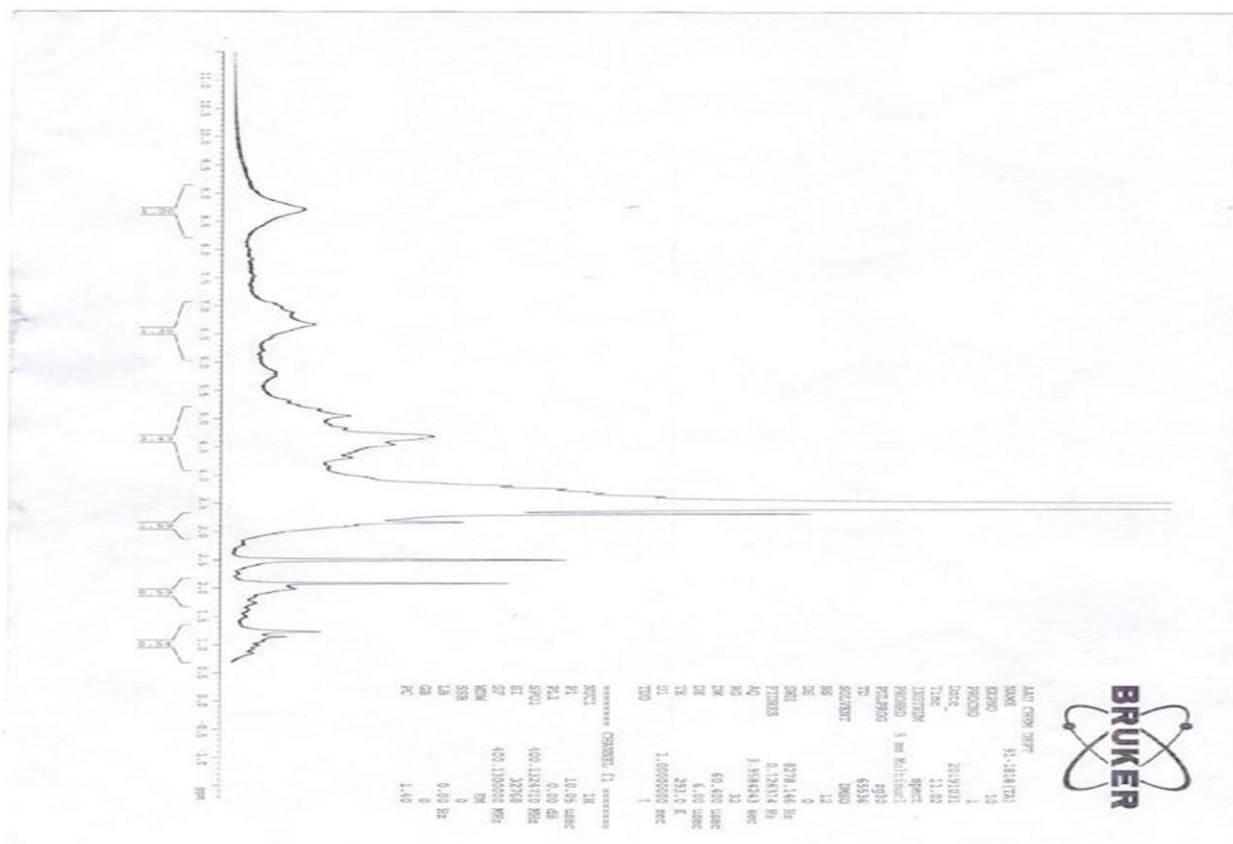



**Appendix 4:** DEPT-135 spectrum of compound TA

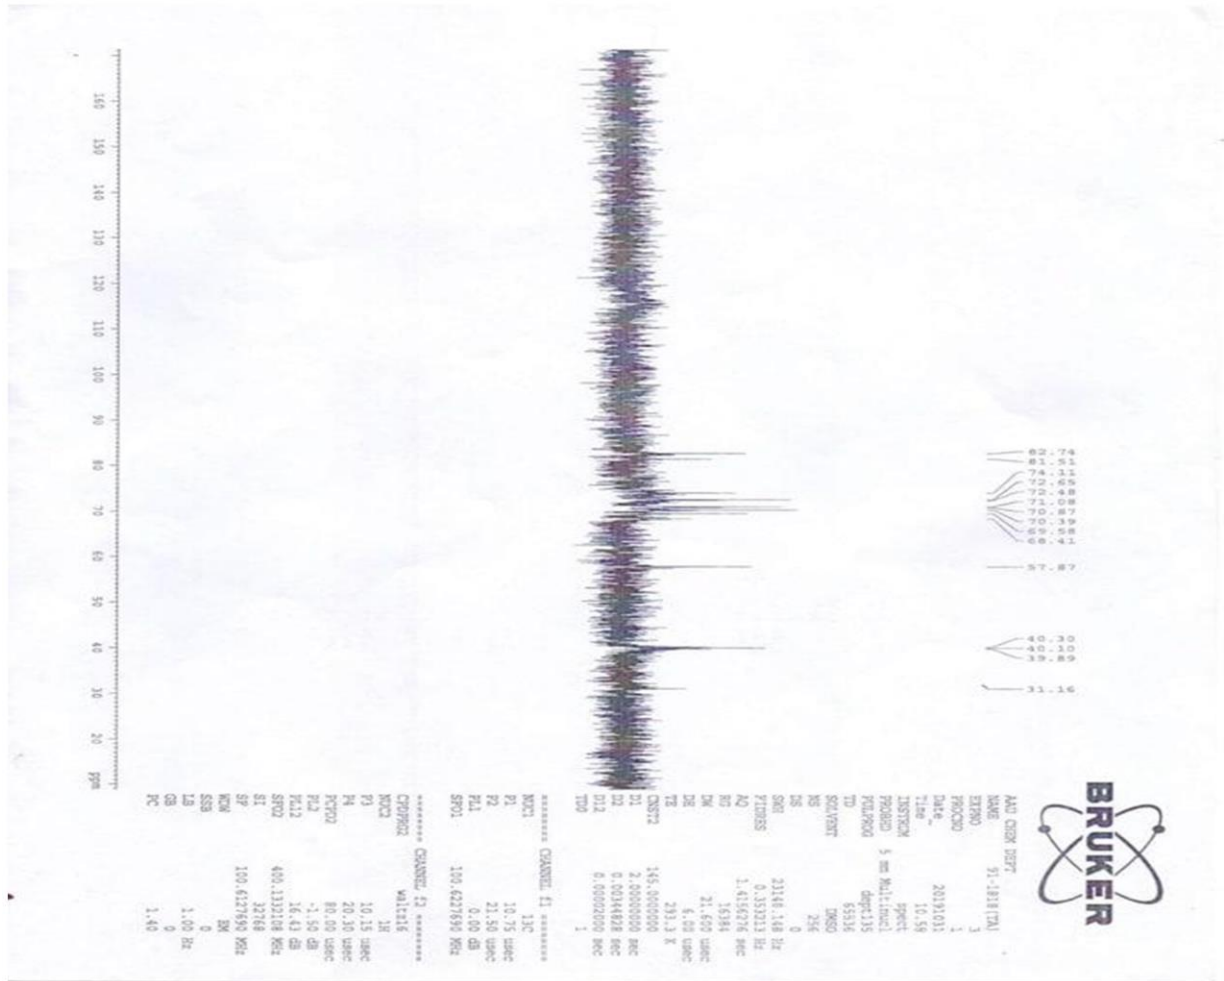

Supplement: Supplementary file 1 [file get_supplementary_file.php]
